Cite this article as: Aodeng S, Wang W, Chen Y, Feng G, Wang J, Lv W *et al.* Safety and efficacy of tracheotomy for critically ill patients with coronavirus disease 2019 (COVID-19) in Wuhan: a case series of 14 patients. *Eur J Cardiothorac Surg* 2020;58:745–51.

# Safety and efficacy of tracheotomy for critically ill patients with coronavirus disease 2019 (COVID-19) in Wuhan: a case series of 14 patients

Surita Aodeng<sup>a,†</sup>, Weiqing Wang<sup>a,†</sup>, Yu Chen<sup>b</sup>, Guodong Feng<sup>a</sup>, Jian Wang<sup>a</sup>, Wei Lv<sup>a</sup>, Hua Yang<sup>a</sup>, Xin Ding<sup>c</sup>,  
Kaicheng Song<sup>d</sup>, Sirui Zhao<sup>a</sup>, Jiazhen Liu<sup>a</sup>, Shuyang Zhang<sup>e,\*</sup> and Zhiqiang Gao<sup>a,\*</sup>

<sup>a</sup> Department of Otorhinolaryngology – Head and Neck Surgery, Peking Union Medical College Hospital, Chinese Academy of Medical Sciences and Peking Union Medical College, Beijing, China

<sup>b</sup> Department of Clinical Laboratory, Peking Union Medical College Hospital, Chinese Academy of Medical Sciences and Peking Union Medical College, Beijing, China

<sup>c</sup> Department of Critical Care Medicine, Peking Union Medical College Hospital, Chinese Academy of Medical Sciences and Peking Union Medical College, Beijing, China

<sup>d</sup> Department of Anesthesiology, Peking Union Medical College Hospital, Chinese Academy of Medical Sciences and Peking Union Medical College, Beijing, China

<sup>e</sup> Department of Cardiology, Peking Union Medical College Hospital, Chinese Academy of Medical Sciences and Peking Union Medical College, Beijing, China

\* Corresponding authors. Department of Otorhinolaryngology – Head and Neck Surgery, Peking Union Medical College Hospital, Chinese Academy of Medical Sciences and Peking Union Medical College, No. 1 Shuaifuyuan, Beijing 100730, China. Tel: +86-10-69156313; e-mail: talllee@sina.com (Z. Gao); Department of Cardiology, Peking Union Medical College Hospital, Chinese Academy of Medical Sciences and Peking Union Medical College, No. 1 Shuaifuyuan, Dongcheng District, Beijing 100730, China. Tel: +86-10-69155066; e-mail: shuyangzhang103@163.com (S. Zhang).

Received 10 May 2020; received in revised form 8 July 2020; accepted 18 July 2020

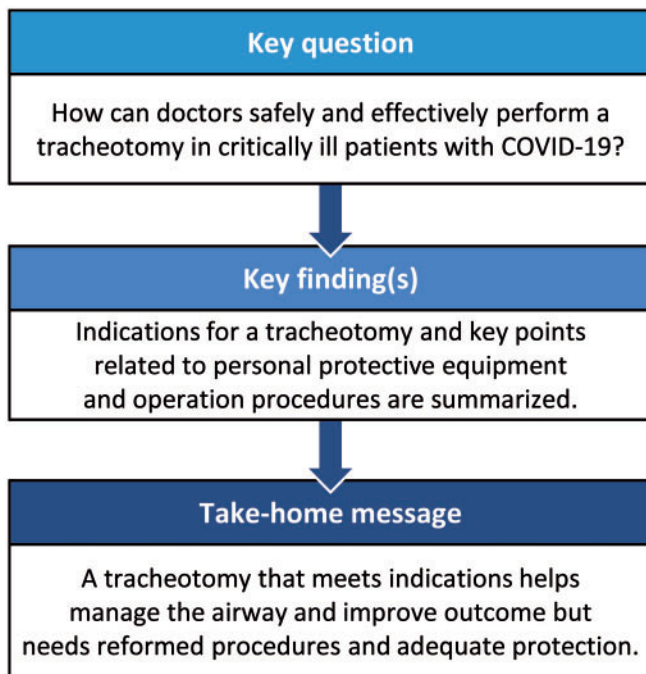

| Indication                                                                                                                                                                                                                                                      | Protection                                                                                                                                                                                                                                                                                             | Tracheotomy                                                                                                                                                                                                                                                                                                         | Nursing                                                                                                                                                                                                                           |
|-----------------------------------------------------------------------------------------------------------------------------------------------------------------------------------------------------------------------------------------------------------------|--------------------------------------------------------------------------------------------------------------------------------------------------------------------------------------------------------------------------------------------------------------------------------------------------------|---------------------------------------------------------------------------------------------------------------------------------------------------------------------------------------------------------------------------------------------------------------------------------------------------------------------|-----------------------------------------------------------------------------------------------------------------------------------------------------------------------------------------------------------------------------------|
| <ul style="list-style-type: none"> <li>• Prolonged intubation &gt;2 weeks and long intubation time expected &gt;2 weeks</li> <li>• Intolerance to orotracheal intubation</li> <li>• Combined secondary infection or increasing secretion discharging</li> </ul> | <ul style="list-style-type: none"> <li>• Inner layer: surgical scrubs, medical protective mask, coverall suit, shoe cover, surgical latex gloves</li> <li>• Outer layer: surgical mask outside, surgical goggles, shoe covers up to the knees, surgical gown, gloves, powered positive PAPR</li> </ul> | <ul style="list-style-type: none"> <li>• Fully sedate and provide analgesia and oxygenate</li> <li>• Suspend ventilator</li> <li>• Pull the cephalic tube</li> <li>• Inflate cuff immediately after inserting tracheostomy tube</li> <li>• Restart ventilator</li> <li>• Monitor the ventilator waveform</li> </ul> | <ul style="list-style-type: none"> <li>• Safe suction by closed sputum aspirator</li> <li>• Maintain closed breathing circuit</li> <li>• Check cuff pressure regularly</li> <li>• Avoid unnecessary inhalation therapy</li> </ul> |

<sup>†</sup>The first two authors contributed equally to this study.

## Abstract

**OBJECTIVES:** Coronavirus disease 2019 (COVID-19) is a global pandemic. Critically ill patients often require prolonged intubation for mechanical ventilation to support breathing; thus, the artificial airway must be managed by tracheotomy. Therefore, studies exploring appropriate and safe methods for tracheotomy that minimize the risks of nosocomial transmission are important.

**METHODS:** A retrospective analysis of the clinical characteristics of 14 critically ill patients with COVID-19, who underwent bedside tracheotomy from March to April 2020 was conducted to summarize the indications for tracheotomy and key points related to personal protective equipment and surgical procedures.

**RESULTS:** All 14 patients were diagnosed with COVID-19 and were critically ill. All tracheotomies were performed in the late phase of the infection course. The interval between the infection and tracheotomy was 33 days, and the median interval between intubation and tracheotomy was 25.5 days. The reverse transcription-polymerase chain reaction results of secretions from the operative incision and inside the tracheotomy tube were negative. Twelve patients improved after tracheotomy, with SpO<sub>2</sub> levels maintained above 96%. One patient died of progressive respiratory failure; another patient died of uncontrolled septic shock. No medical staff who participated in the tracheotomy was infected.

**CONCLUSIONS:** Tracheotomy in critically ill patients with COVID-19 who meet the indications for tracheotomy potentially represents a safer approach to manage the airway and help improve the treatment outcomes. A tracheotomy performed in the late phase of the disease has a relatively low risk of infection. Adherence to key steps in the tracheotomy procedure and donning adequate personal protection will help medical staff avoid infection.

**Keywords:** COVID-19 • Critical care • Tracheotomy • Surgical indications • Protective measures

### ABBREVIATIONS

|            |                                               |
|------------|-----------------------------------------------|
| COVID-19   | Coronavirus disease 2019                      |
| ICU        | Intensive care unit                           |
| PCR        | Polymerase chain reaction                     |
| PPE        | Personal protective equipment                 |
| SARS-CoV-2 | Severe acute respiratory syndrome coronavirus |

## INTRODUCTION

Beginning in December 2019, a new form of severe acute respiratory syndrome coronavirus (SARS-CoV-2) caused an outbreak of coronavirus disease 2019 (COVID-19) worldwide. COVID-19 is a contagious pulmonary infectious disease that is transmitted via respiratory droplets and aerosols. Because of its long latency and ability to spread easily among people, COVID-19 has infected more than 2 million people worldwide, causing 160 120 confirmed deaths to date [1].

According to a report from the Chinese Center for Disease Control and Prevention, ~81% of patients with COVID-19 show mild disease presentation with no or mild pneumonia, while 5–15% of patients with severe symptoms are admitted to the intensive care unit (ICU) in a critical condition [2].

China was the first country to report the COVID-19 pandemic worldwide, with most cases located in Wuhan, Hubei Province. The high rate of hospital and ICU admissions provoked serious overcrowding in hospitals throughout Wuhan [2]. The government completely locked down the city and mobilized tens of thousands of medical practitioners and tons of medical supplies to Wuhan from all over the country to stop the transmission and provide sufficient medical services to the patients.

The quick spread of COVID-19 placed extreme pressure on the healthcare system and led to a personal protective equipment (PPE) shortage, which put medical staff at a higher risk of infection. Various respiratory treatments for critically ill patients, such as intubation, manual ventilation with a resuscitator, non-

invasive ventilation, high-flow nasal cannula, bronchoscopy examination, suction and patient transportation, are considered high-risk factors for nosocomial transmission because of their greater possibility of causing or worsening the spread of the virus. According to data from Italy, ~10% of Italian patients are healthcare workers [3]. Therefore, medical staff must be fully equipped to minimize the possibility of nosocomial transmission.

Critically-ill patients often require prolonged intubation for mechanical ventilation, which requires safer airway management. A recent systematic review revealed that early tracheotomy performed in the first 7 days after orotracheal intubation is associated with reductions in the mechanical ventilation duration, mortality rate and length of stay in the ICU [4]. Although surgical tracheotomy is a routine procedure for otolaryngology surgeons in daily practice, direct access to the trachea and mechanical ventilation during this procedure might spurt tremendous amounts of droplets and aerosols, placing surgeons and ICU workers in the highest risk category [5]. Therefore, surgical tracheotomy is preferable for sedated and intubated patients rather than awake patients. Percutaneous dilatational tracheotomy is not optimal because mechanical ventilation should not be stopped for long periods, and droplet emission inevitably occurs at a higher rate. To date, our team has performed 14 cases of surgical tracheotomy in critically ill patients with COVID-19 in the ICU while employing proper protective measures, with no nosocomial transmission. Due to the increasing number of confirmed COVID-19 cases and the increasing need for tracheotomy in ICU patients, we summarize our experience with tracheotomy to minimize the risk of nosocomial infection and avoid healthcare worker shortages.

## PATIENTS AND METHODS

This study was approved by our local ethics committee. Written informed consent was waived by the Ethics Commission of the designated hospital for emerging infectious disease due to the urgent need to collect data.

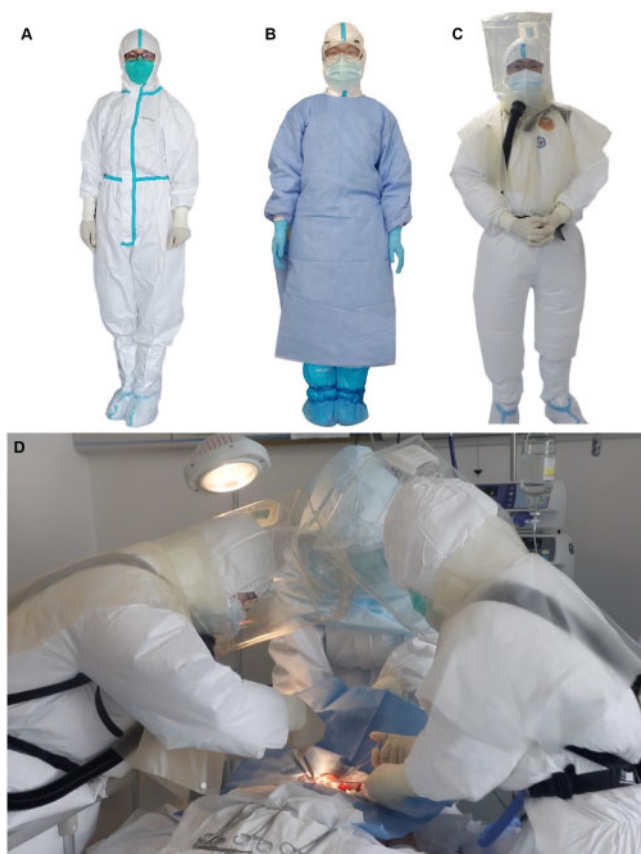

**Figure 1:** Two layers of personal protective equipment. (A) Inner layer including a N95 medical protective mask and coverall suit. (B) Outer layer including surgical goggles, another surgical mask and gown outside. (C) Second outer layer with a pressure air-purifying respirator. (D) Two otolaryngologists and an anaesthetist performing a tracheotomy.

The clinical data from 14 patients with COVID-19 in our ICU who underwent a tracheotomy from February to April 2020 were retrospectively analysed. This unit, which was established under emergency conditions to accept the most critically ill patients during the outbreak of COVID-19, was managed by a multidisciplinary team from Peking Union Medical College Hospital in the Sino-French New City Branch of Tongji Hospital in Wuhan, China. All patients were evaluated for the clinical course, intubation timing, surgical indications, secondary pneumonic infection and past medical history. Samples from the operative incision and secretions from the endotracheal tube were collected for reverse transcription-polymerase chain reaction (PCR) analyses of the SARS-CoV-2 RNA after the operation. In addition, viral RNAs from oropharyngeal swabs and serum IgM and IgG antibody titres were routinely measured during the disease course.

Tracheotomy was performed in the same manner as the conventional operation beside the ICU bed. The appropriate setting and PPE (Fig. 1A–D) worn during the procedure are described in the discussion section. The anaesthetist maintained the analgesia status of intubated and sedated patients and carefully monitored their vital signs. Furthermore, the dose of the drug used for neuromuscular blockade was adjusted by the anaesthetist to prevent swallowing and cough reflexes. Secretions of the oropharynx and in endotracheal tube were collected before the operation. Oxygenation was achieved with a ventilator. After the tissue at the front of the neck was dissected and the anterior wall of the

trachea (2–4 rings) was exposed clearly, the ventilator was suspended. Then, the surgeon quickly completed the tracheal anterior wall incision and inserted the tracheotomy tube. The cuff was inflated immediately and confirmed to avoid leakage, and then the anaesthetist reconnected the ventilator and restarted the assisting breathing. The anaesthetist monitored the ventilator waveform to ensure that the endotracheal tube was placed in the correct position (Fig. 2).

## RESULTS

All 14 patients (6 males and 8 females) had a SARS-CoV-2 infection confirmed by reverse transcription PCR for viral RNA in respiratory samples, in combination with the clinical history and pulmonary chest computed tomography findings. All patients were diagnosed as critically ill according to the diagnostic criteria of China's seventh version of the diagnosis and treatment guidelines for COVID-19 (3 March 2020) and treated by our multidisciplinary ICU team. Most patients were senior citizens aged 55–80 years old. All patients had previously been diagnosed with one or multiple chronic underlying diseases, including primary hypertension, type 2 diabetes mellitus and coronary heart disease, among others. Twelve (85.71%) patients had secondary infections with other pathogens in the lung (Table 1).

All tracheotomies were performed in the late phase of the COVID-19 infection ( $\geq 15$  days). The minimal interval between infection and tracheotomy was 33 days (range: from 33 to 90 days) (Table 1). The median interval between intubation and tracheotomy was 25.5 days (range: from 13 to 33 days) (Table 1). The average operation time was  $\sim 30$  min, and the respiratory and circulatory functions were stable during the operation. The wound showed no obvious bleeding after the operation. None of the medical staff who participated in the tracheotomy was infected. Viral RNA reverse transcription PCR analyses of samples from the operative incision and endotracheal discharge were performed on the same day after the operation. The results of all these samples were negative (Table 2). PCR of the oropharyngeal swabs collected before and after the operation and analysed within 1 week all showed negative results. The serum IgM and IgG antibody titres were also measured. In the late phase, all patients showed IgG seropositivity, and most of them even showed strong seropositivity (85.71%), while only a minor proportion of them showed IgM seropositivity (18.57%) (Table 2).

The treatment outcomes of 12 of the 14 patients improved after the tracheotomy to varying degrees. Seven of these patients were removed from mechanical ventilation, and the other 5 patients were receiving anti-infective and supportive treatment with continuous invasive mechanical ventilation until the date our data were collected (Table 1). The conditions of all 12 patients were stable, with SpO<sub>2</sub> levels maintained at  $>96\%$ . Patient no. 1 died of progressive respiratory failure, and patient no. 9 underwent vein-vein extracorporeal membrane oxygenation treatment after tracheotomy and died of uncontrolled septic shock.

## DISCUSSION

In this study, we report the results of 14 critically ill patients with COVID-19 who underwent bedside conventional tracheotomy in the ICU. Tracheotomy was safe when proper biosafety

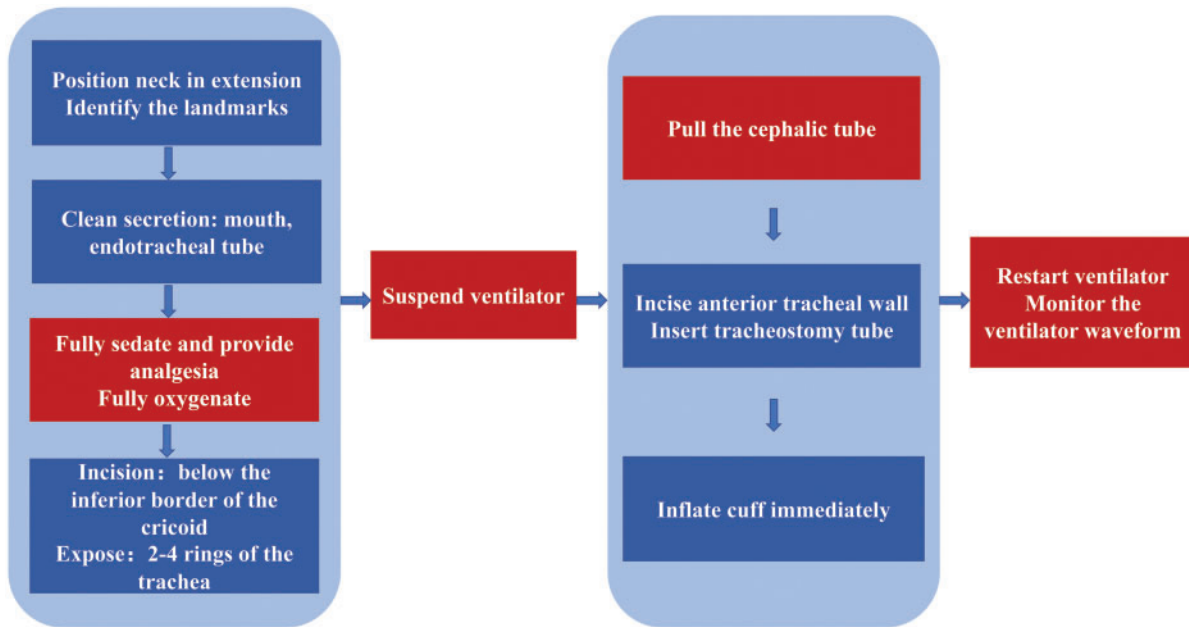

**Figure 2:** Illustration of the steps for a safe tracheostomy in coronavirus disease 2019-positive patients. Blue steps are performed by an otolaryngologist. Red steps are performed by the anaesthetist.

**Table 1:** Clinical characteristics of 14 critically ill patients with COVID-19 who underwent a bedside tracheostomy in the ICU in Wuhan

| No. | Age/sex | Diagnosis date | Intubation date | Tracheostomy date | I-T interval (days) | Past medical history   | Lung infection   | Prognosis                              |
|-----|---------|----------------|-----------------|-------------------|---------------------|------------------------|------------------|----------------------------------------|
| 1   | 74/F    | D13            | D31             | D58               | 27                  | HTN                    |                  | Died on D71 due to respiratory failure |
| 2   | 69/M    | D13            | D24             | D48               | 24                  | HTN, T2DM, CI          | MDR-PAE          | Off ventilator                         |
| 3   | 55/F    | D3             | D24             | D50               | 26                  | CHD                    | PAE, MDR-ABA     | IMV                                    |
| 4   | 65/F    | D9             | D12             | D33               | 21                  | HTN, T2DM, CHD         | MDR-ABA          | Off ventilator                         |
| 5   | 69/M    | D9             | D25             | D57               | 32                  | CHD                    | MDR-ABA, MDR-PAE | Off ventilator                         |
| 6   | 70/M    | D8             | D10             | D37               | 27                  | R-NPC, CI              | MDR-PAE, Candida | Off ventilator                         |
| 7   | 67/F    | D7             | D24             | D41               | 17                  | HTN, PPR-breast cancer |                  | IMV                                    |
| 8   | 55/F    | D6             | D14             | D40               | 26                  | HTN, obesity           | MDR-KPN          | Off ventilator                         |
| 9   | 80/F    | D12            | D41             | D56               | 15                  | HTN                    | PAE              | Died on D50 due to septic shock        |
| 10  | 66/M    | D9             | D27             | D60               | 33                  | CHD                    | PAE              | Off ventilator                         |
| 11  | 58/F    | D0             | D37             | D70               | 33                  | HTN, T2DM              | SM               | IMV                                    |
| 12  | 77/M    | D28            | D65             | D90               | 25                  | Bradycardia, CPI       | Candida          | IMV                                    |
| 13  | 69/M    | D7             | D10             | D42               | 32                  | PP-lung cancer, CPI    | MDR-ABA, SM      | IMV                                    |
| 14  | 68/F    | D12            | D25             | D38               | 13                  | AICH, HTN, T2DM        | MDR-ABA, Candida | Off ventilator                         |

ABA: *Acinetobacter baumannii*; AICH: acute intracerebral haemorrhage; CHD: coronary heart disease; CI: cerebral infarction; COVID-19: coronavirus disease 2019; CPI: cardiac pacemaker implantation; Diagnosis date: diagnosis date after disease onset; HTN: hypertension; ICU: intensive care unit; IMV: invasive mechanical ventilation; Intubation date: intubation date after disease onset; I-T Interval: interval from intubation to tracheostomy; KPN: *Klebsiella pneumoniae*; Lung infection: pathogens causing a secondary lung infection; MDR: multidrug-resistant; PAE: *Pseudomonas aeruginosa*; PP-lung cancer: postoperative for lung cancer; PPR-breast cancer: postoperative for breast cancer; R-NPC: radiotherapy for nasopharyngeal carcinoma; SM: *Stenotrophomonas maltophilia*; T2DM: type 2 diabetes mellitus; Tracheostomy date: tracheostomy date after disease onset.

precautions were implemented to protect medical staff from SARS-CoV-2 infection.

COVID-19 displays viral exuding inflammation with alveolar damage in the early stage [2, 6]. If the patients exhibit respiratory failure or hypoxaemia with signs of severe pulmonary infection, international experts recommend that immediate intubation with mechanical ventilation in the prone position to correct acute respiratory distress syndrome [7–9]. With the progression of the disease, critically ill patients may develop secondary bacterial or fungal infections and the retention of secretions that obstruct the small airways. In our study, 85.71% of patients (12/14) had

combined secondary pulmonary infections, including bacterial and fungal infections, which led to increased respiratory secretions and thick sputum. Moreover, many patients are unable to tolerate prolonged orotracheal intubation, which potentially renders the cannula prone to obstruction by secretions and necrosis of the mucosa of the mouth and trachea, even resulting in tracheomalacia and tracheal stenosis. In contrast, tracheostomy may allow the patients to become more comfortable and increase the safety of airway management, including the administration of fewer sedative agent doses, easier secretion suction and drainage and faster recovery of spontaneous breathing. Therefore,

tracheotomy does not bring more benefits to patients than orotracheal intubation in the early stage.

The detection of antibodies against SARS-CoV-2 reflects the course of the disease to some extent. It is recommended as an effective supplementary indicator for suspected cases with negative viral RNA detection or in conjunction with RNA detection for disease diagnosis. A retrospective analysis from China revealed that the RNA test for sputum specimens had the highest detectability rate (92.3%), followed by throat swabs (69.2%). Antibody detection showed lower positive rates (IgM, 23.0% and IgG, 53.8%) in the early phase of the disease (<8 days). However, the sensitivity of antibody detection exceeded the RNA test beginning on day 8 after onset (IgM, 50.0% and IgG, 87.5%). In the late phase ( $\geq 15$  days), the sensitivity of IgM and IgG tests increased to 52.2% and 91.3%, respectively, while the positive rate of throat swabs was only 13.0% [10]. In our unit, the minimal interval between the infection and tracheotomy was 33 days, and the interval between intubation and tracheotomy was  $\sim 2$ –4 weeks. All patients were in the late phase of COVID-19 infection ( $\geq 15$  days). During this phase, viral RNA detection (otolaryngeal swabs, endotracheal secretions and operative incisions) was negative, IgG was detected at a 100% positive rate and IgM was only detected at low positive rates.

We recommend indications for surgical tracheotomy in critically ill patients with COVID-19, including (i) mechanical ventilation during a prolonged intubation time (more than 2 weeks) and a long intubation time expected (more than 2 weeks), (ii) intolerance to orotracheal intubation and (iii) combined secondary infection with other pathogens or increasing amounts of secretion discharge.

Because tracheotomy is one of the highest risk procedures during the treatment of COVID-19, medical staff must be appropriately protected from infection when performing this procedure. To date, evidence-based guidelines on the use of PPE are not available. The basic principle of covering should be multi-layer donning and doffing to minimize the possibility of contamination. In our practice, medical staff should wear level 3 PPE equipment during the procedure. As the inner layer, we wear surgical scrubs or a work uniform, 1 KN95 (China), N95 (USA) or FFP2 (Europe) medical protective mask, coverall suit, shoe cover and surgical latex gloves (Fig. 1A). As the outer layer, we wear another surgical mask outside, surgical gown and gloves, then put on a powered positive pressure air-purifying respirator (Fig. 1B and C). If a pressure air-purifying respirator is not available in some hospitals, it can be replaced with a completely enclosed surgical helmet (Fig. 1D). Uncertainty and variable practices regarding PPE remain worldwide, and some countries recommend lower levels of PPE [7, 11–14]. However, evidence of the association between the level of PPE and coronavirus transmission is currently lacking and requires further investigation. Therefore, we used a higher level of PPE to avoid nosocomial infection. Uncertainty exists regarding whether an N95 mask should be worn if a pressure air-purifying respirator is used [7]. We chose to wear the N95 mask to protect us from self-contamination during the doffing of PPE. Recent studies also confirmed that the risk of disease transmission to healthcare workers is very low when a similar level of PPE as described here is used [15, 16].

After being completely equipped in the buffer room as described above, the surgical team, which was composed of 2 otolaryngology surgeons, 1 anaesthetist and 2 nurses, entered

**Table 2:** Results of PCR analyses of otolaryngeal swabs and serum IgM and IgG antibody titres

| No. | Tracheotomy date | Swab    | Antibody type | Level (AU/ml) |
|-----|------------------|---------|---------------|---------------|
| 1   | D58              | D54 Neg | IgM           | 2.33          |
|     |                  |         | IgG           | 17.79         |
| 2   | D48              | D48 Neg | IgM           | 29.04         |
|     |                  |         | IgG           | 97.07         |
| 3   | D50              | D53 Neg | IgM           | 0.33          |
|     |                  |         | IgG           | 20.78         |
| 4   | D33              | D33 Neg | IgM           | 1.51          |
|     |                  |         | IgG           | 117.7         |
| 5   | D57              | D57 Neg | IgM           | 4.57          |
|     |                  |         | IgG           | 96.97         |
| 6   | D37              | D39 Neg | IgM           | 6.27          |
|     |                  |         | IgG           | 79.48         |
| 7   | D41              | D39 Neg | IgM           | 20.69         |
|     |                  |         | IgG           | 389.66        |
| 8   | D40              | D40 Neg | IgM           | 45.12         |
|     |                  |         | IgG           | 220.13        |
| 9   | D56              | D50 Neg | IgM           | 2.3           |
|     |                  |         | IgG           | 49.6          |
| 10  | D60              | D66 Neg | IgM           | 17.38         |
|     |                  |         | IgG           | 101.46        |
| 11  | D70              | D68 Neg | IgM           | 0.74          |
|     |                  |         | IgG           | 46.42         |
| 12  | D90              | D92 Neg | IgM           | 2.74          |
|     |                  |         | IgG           | 84.47         |
| 13  | D42              | D36 Neg | IgM           | 5.39          |
|     |                  |         | IgG           | 104.24        |
| 14  | D38              | D35 Neg | IgM           | 0.43          |
|     |                  |         | IgG           | 62.62         |

'-': <10 AU/ml (normal range); '↑':  $\geq 10$ –50 AU/ml; '↑↑':  $\geq 50$ –100 AU/ml; '↑↑↑':  $\geq 100$  AU/ml; Neg: negative; PCR: polymerase chain reaction; Swab: date of the PCR test and result of oropharyngeal swab after disease onset; Tracheotomy date: tracheotomy date after disease onset.

the isolated negative pressure ICU room. Other medical staff remained outside to minimize the infection risk. The procedure was performed at the bedside to minimize the risks of spreading the virus and endangering critically ill patients during the process of transporting them to the operating room [17]. The presence of 2 experienced surgeons ensured a fast and effective tracheotomy compared with less experienced surgeons or residents (Fig. 1D). The anaesthetist administered aesthetic agents to prevent swallowing and cough reflexes, control the ventilator and remove the tube after tracheal incision (Fig. 1D) [17]. The critical and most important steps should be performed by the anaesthetist and the otolaryngologist in skilled cooperation [18]. The anaesthetist stops the ventilator and deflates the cuff, and the surgeon opens the anterior wall of the trachea and quickly inserts the tube. The cuff is then inflated immediately and the lack of leakage is confirmed by the anaesthetist. A scrub nurse and an assistant nurse should handle the surgical table and assist the anaesthetist. In addition to the necessary surgical instruments, a non-fenestrated cuffed tracheotomy tube of the expected diameter should be prepared on the surgical table. After the tracheotomy, reusable medical devices should be disinfected according to the disinfection procedures for SARS-CoV-2, and all surfaces of objects should be wiped with a disinfectant containing 1000 mg/l active chlorine.

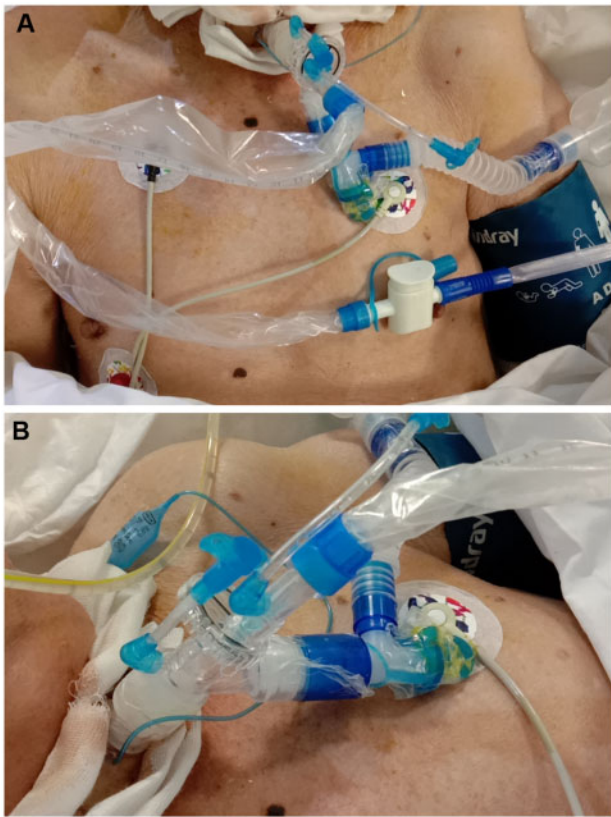

**Figure 3:** Completely enclosed sputum aspirator. (A) Anterior view. (B) Lateral view.

The nurses providing care to patients after tracheotomy also face an exposure risk. We chose a completely closed sputum aspirator to prevent the airway from directly opening and generating droplets and aerosol contamination, which will promote virus spread (Fig. 3). In addition, the breathing circuit should be maintained in the closed position during mechanical ventilation, and virus filters are inserted in both the inhalation and expiration ends. If no obvious contamination is detected, the breathing circuit does not need to be replaced routinely. In terms of airway protection, the cuff pressure should be maintained at 25–30 cmH<sub>2</sub>O (1 cmH<sub>2</sub>O = 0.098 kPa), and it should be monitored every 6–8 h after the artificial airway (orotracheal intubation or tracheotomy) is established. We recommend that cannula management should be performed by trained nursing staff [19]. With this range of cuff pressures, we are able to ensure effective ventilation, reduce air leakage contamination caused by inadequate cuff sealing and avoid airway mucosal compression injury caused by the overinflation of intubation cuffs [20]. Because airborne transmission is presumed to occur when respiratory particles <5 μm in diameter are inhaled and deposited in the lungs [21], we recommend that patients with COVID-19 avoid unnecessary inhalation therapy as much as possible for airway humidification. The results of aerosol aerodynamic transmission studies of influenza virus (another airborne RNA virus) showed that 65% of the influenza RNA was contained in particles ≤4 μm in aerodynamic diameter (23% in particles 1–4 μm and 42% in particles <1 μm), indicating that most of the viral RNA is contained within particles in the respirable size range and the airborne route may be a transmission pathway [22]. Although the drug aerosol diffused during airway humidification has a lower risk of spreading the

disease than the aerosol particles discharged from the patient, the aerosol generated during atomization may still carry the virus expelled in the patient's exhaled air. Therefore, unnecessary inhalation therapy should be avoided during the pandemic. Regarding ventilation in the prone position, 1 staff member should stand at the head of the bed, handle the tracheal intubation, and place the U-shaped pillow cushion on the pressure side to prevent the tracheal tube from being compressed. Changes in the waveform, tidal volume and minute ventilation volume must be monitored, and an arterial blood gas analysis could be performed if necessary. Patients who have undergone a tracheotomy may need to retain the cannula for a period of time after being weaned from mechanical ventilation, and thus we recommend the use of a filter to provide airway warming and humidity. The dressing of the wound should be changed daily to prevent infection, and the tightness of neck fixation should be monitored routinely.

Due to the recent COVID-19 pandemic, several studies on tracheotomy management in patients with COVID-19 have been published [18, 19, 23, 24], with the aim of providing helpful information to minimize the risks of nosocomial transmission. To our knowledge, we are the first group to summarize our own experiences with an open bedside tracheotomy at a centre in the hardest-hit region of China. Compared with open tracheotomy in the operating room, open bedside tracheotomy might reduce potential exposure risks associated with transport between the ICU and operating room. Additionally, we systematically described the procedures for donning PPE in detail, which will allow medical staff to easily follow the instructions. Nursing work, particularly work related to airway humidification and ventilation in the prone position, was also reported. Importantly, our study described and analysed the PCR results for SARS-CoV-2 and serum IgM and IgG antibody titres, which might be valuable for evaluating the infection risks of these invasive procedures and assessing clinicians in determining the indications for and timing of tracheotomy.

## CONCLUSIONS

A tracheotomy performed in the late phase of COVID-19 in critically ill patients has a relatively low risk of infection. Proper extension of the intubation time (2–4 weeks) of patients who require invasive mechanical ventilation is acceptable. If the patient shows intolerance to orotracheal intubation or has a secondary lung infection, tracheotomy might represent a safer method to manage the airway and help improve the treatment outcomes. Compared with conventional tracheotomy, the modified tracheotomy procedure should include the use of neuromuscular blockade to completely sedate the patients, along with the suspension of ventilation before opening the airway. Donning adequate personal protection will help medical staff avoid infection.

**Conflict of interest:** none declared.

## Author contributions

**Surita Aodeng:** Data curation; Project administration; Writing—original draft. **Weiqing Wang:** Data curation; Investigation; Writing—original draft. **Yu Chen:** Project administration; Resources. **Guodong Feng:** Formal analysis; Investigation; Writing—review & editing. **Jian Wang:** Formal analysis; Investigation; Writing—review & editing. **Wei Lv:** Formal analysis;

Investigation; Writing—review & editing. **Hua Yang:** Formal analysis; Investigation; Writing—review & editing. **Xin Ding:** Project administration. **Kaicheng Song:** Project administration. **Sirui Zhao:** Project administration. **Jiazhen Liu:** Project administration. **Shuyang Zhang:** Project administration; Supervision; Writing—review & editing. **Zhiqiang Gao:** Project administration; Supervision; Writing—review & editing.

## Reviewer information

European Journal of Cardio-Thoracic Surgery thanks Riyad Karmy-Jones, Masafumi Kawamura and the other, anonymous reviewer(s) for their contribution to the peer-review process of this article.

## REFERENCES

- [1] World Health Organization (WHO). Coronavirus Disease (COVID-19) Pandemic. 2020. <https://www.who.int/emergencies/diseases/novel-coronavirus-2019> (26 April 2020, date last accessed).
- [2] Wu Z, McGoogan JM. Characteristics of and important lessons from the coronavirus disease 2019 (COVID-19) outbreak in china: summary of a report of 72314 cases from the Chinese Center for Disease Control and Prevention. *JAMA* 2020;323:1239.
- [3] Istituto Superiore di Sanità (ISS). Integrated Surveillance of COVID-19 in Italy. 2020. [https://www.epicentro.iss.it/coronavirus/bollettino/Infografica\\_28marzo](https://www.epicentro.iss.it/coronavirus/bollettino/Infografica_28marzo) ENG.pdf (26 April 2020, date last accessed).
- [4] Adly A, Youssef TA, El-Beghermy MM, Younis HM. Timing of tracheostomy in patients with prolonged endotracheal intubation: a systematic review. *Eur Arch Otorhinolaryngol* 2018;275:679–90.
- [5] Tran K, Cimon K, Severn M, Pessoa-Silva CL, Conly J. Aerosol generating procedures and risk of transmission of acute respiratory infections to healthcare workers: a systematic review. *PLoS One* 2012;7:e35797.
- [6] Huang C, Wang Y, Li X, Ren L, Zhao J, Hu Y *et al.* Clinical features of patients infected with 2019 novel coronavirus in Wuhan, China. *Lancet* 2020;395:497–506.
- [7] Yao W, Wang T, Jiang B, Gao F, Wang L, Zheng H *et al.* Emergency tracheal intubation in 202 patients with COVID-19 in Wuhan, China: lessons learnt and international expert recommendations. *Br J Anaesth* 2020;125:e28–37.
- [8] Alhazzani W, Moller MH, Arabi YM, Loeb M, Gong MN, Fan E *et al.* Surviving sepsis campaign: guidelines on the management of critically ill adults with coronavirus disease 2019 (COVID-19). *Crit Care Med* 2020;48:e440–69.
- [9] Bajwa AA, Arasi L, Canabal JM, Kramer DJ. Automated prone positioning and axial rotation in critically ill, nontrauma patients with acute respiratory distress syndrome (ARDS). *J Intensive Care Med* 2010;25:121–5.
- [10] Gao Y, Yuan Y, Li T, Wang X, Li X, Li A *et al.* Evaluation of the auxiliary diagnostic value of antibody assays for the detection of novel coronavirus (SARS-CoV-2). *J Med Virol* 2020; 10.1002/jmv.25919.
- [11] The First Affiliated Hospital, Zhejiang University School of Medicine. Handbook of COVID-19 Prevention and Treatment. 2020. <https://gmcc.alibabadoctor.com/prevention> (26 April 2020, date last accessed).
- [12] European Centre for Disease Prevention and Control. Infection Prevention and Control for COVID-19 in Healthcare Settings. 2020. <https://www.ecdc.europa.eu/sites/default/files/documents/COVID-19-infection-preventionand-control-healthcare-settings-march-2020.pdf> (26 April 2020, date last accessed).
- [13] World Health Organization. Clinical Management of Severe Acute Respiratory Infection When Novel Coronavirus (nCoV) Infection Is Suspected: Interim Guidance. 2020. [https://www.who.int/publications-detail/clinical-management-of-severe-acute-respiratoryinfection-when-novel-coronavirus-\(ncov\)-infection-is-suspected](https://www.who.int/publications-detail/clinical-management-of-severe-acute-respiratoryinfection-when-novel-coronavirus-(ncov)-infection-is-suspected) (26 April 2020, date last accessed).
- [14] Public Health England. COVID-19: Infection Prevention and Control. 2020. <https://www.gov.uk/government/publications/wuhannovel-coronavirus-infection-prevention-and-control> (13 March 2020, date last accessed).
- [15] Meng L, Qiu H, Wan L, Ai Y, Xue Z, Guo Q *et al.* Intubation and ventilation amid the COVID-19 outbreak: Wuhan's experience. *Anesthesiology* 2020;132:1317–32.
- [16] Chen X, Liu Y, Gong Y, Guo X, Zuo M, Li J *et al.* Perioperative management of patients infected with the novel coronavirus: recommendation from the Joint Task Force of the Chinese Society of Anesthesiology and the Chinese Association of Anesthesiologists. *Anesthesiology* 2020;132:1307–16.
- [17] Tay JK, Khoo ML, Loh WS. Surgical considerations for tracheostomy during the COVID-19 pandemic: lessons learned from the severe acute respiratory syndrome outbreak. *JAMA Otolaryngol Head Neck Surg* 2020; doi: 10.1001/jamaoto.2020.0764.
- [18] Broderick D, Kyzas P, Sanders K, Sawyerr A, Katre C, Vassiliou L. Surgical tracheostomies in Covid-19 patients: important considerations and the “5Ts” of safety. *Br J Oral Maxillofac Surg* 2020;58:585–9.
- [19] Pichi B, Mazzola F, Bonsembiante A, Petrucci G, Zocchi J, Moretto S *et al.* CORONA-steps for tracheotomy in COVID-19 patients: a staff-safe method for airway management. *Oral Oncol* 2020;105:104682.
- [20] Respiratory Care Committee of Chinese Thoracic Society. Expert consensus on preventing nosocomial transmission during respiratory care for critically ill patients infected by 2019 novel coronavirus pneumonia. *Zhonghua Jie He He Hu Xi Za Zhi* 2020;43:288–96.
- [21] Wilson NM, Norton A, Young FP, Collins DW. Airborne transmission of severe acute respiratory syndrome coronavirus-2 to healthcare workers: a narrative review. *Anaesthesia* 2020;75:1086–95.
- [22] Lindsley WG, Blachere FM, Thewlis RE, Vishnu A, Davis KA, Palmer JE *et al.* Measurements of airborne influenza virus in aerosol particles from human coughs. *PLoS One* 2010;5:e15100.
- [23] Prabhakaran K, Malcom R, Choi J, Chudner A, Moscatello A, Panzica P *et al.* Open tracheotomy for COVID 19 positive patients: a method to minimize aerosolization and reduce risk of exposure. *J Trauma Acute Care Surg* 2020;89:265–71.
- [24] Turri-Zanoni M, Battaglia P, Czaczkes C, Pelosi P, Castelnuovo P, Cabrini L. Elective tracheostomy during mechanical ventilation in patients affected by COVID-19: preliminary case series from Lombardy, Italy. *Otolaryngol Head Neck Surg* 2020;163:135–7.
